# Supplementary material for: A spatiotemporal anticancer drug release platform of PEGylated graphene oxide triggered by glutathione in vitro and in vivo
Source: Royal Society of Chemistry journal article supplement (doi:10.1039/c2jm34853e), 2012-01-01
Supplement: c2jm34853e.pdf [file c2jm34853e.pdf]

**Supplementary Information for**  
**Spatiotemporal anticancer drug release platform of**  
**PEGylated graphene oxide triggered by glutathione *in vitro***  
**and *in vivo***

**Uriintuya Dembereldorj,<sup>a</sup> Mira Kim,<sup>a</sup> Semi Kim,<sup>a</sup> Erdene Ochir Ganbold,<sup>a</sup> So**  
**Yeong Lee<sup>b,\*</sup> and Sang-Woo Joo<sup>a,\*</sup>**

<sup>a</sup> *Department of Chemistry, Soongsil University, Seoul 156-743, Korea.*

<sup>b</sup> *College of Veterinary Medicine, Seoul National University, Seoul, 151-742, Korea.*

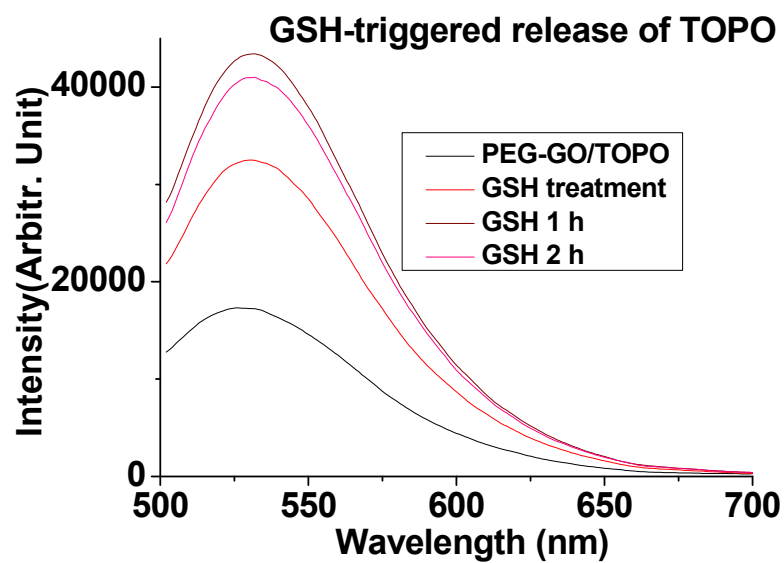

Fig. S1 Release of TOPO via GSH (2 mM) from PEG-GO.

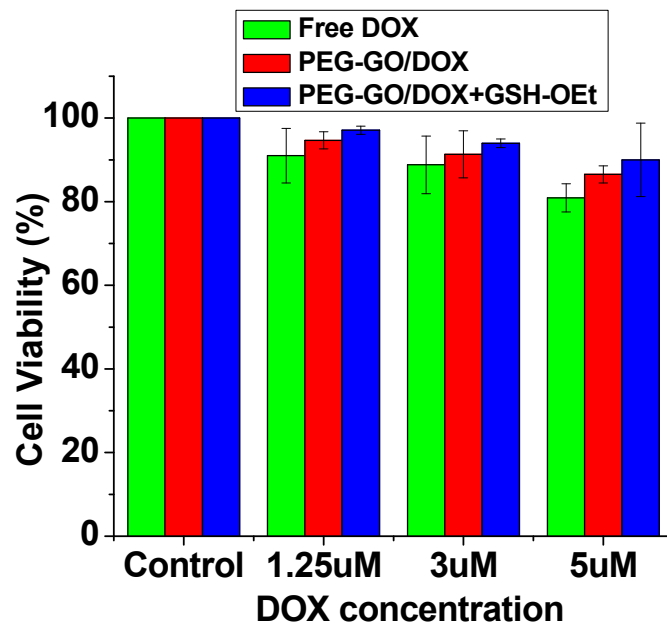

Fig. S2 Cell viability of free DOX, PEG-GO/DOX, and PEG-GO after GSH-OEt treatment.
